# Supplementary material for: Dual-emission ratiometric fluorescent probe based on Uio-66- NH 2 @CQDs for quantitative detection of acetophenone
Source: Research Square preprint supplement (doi:10.21203/rs.3.rs-7393397/v1), 2025-08-29

GRAPHICAL ABSTRACT

**Dual-emission ratiometric fluorescent probe based on** **Uio-66-NH2@CQDs for quantitative detection of acetophenone**

Yongze Shou, Zhouqing Xu*, Huijun Li*, Wenjie Liu, Junkun Wang


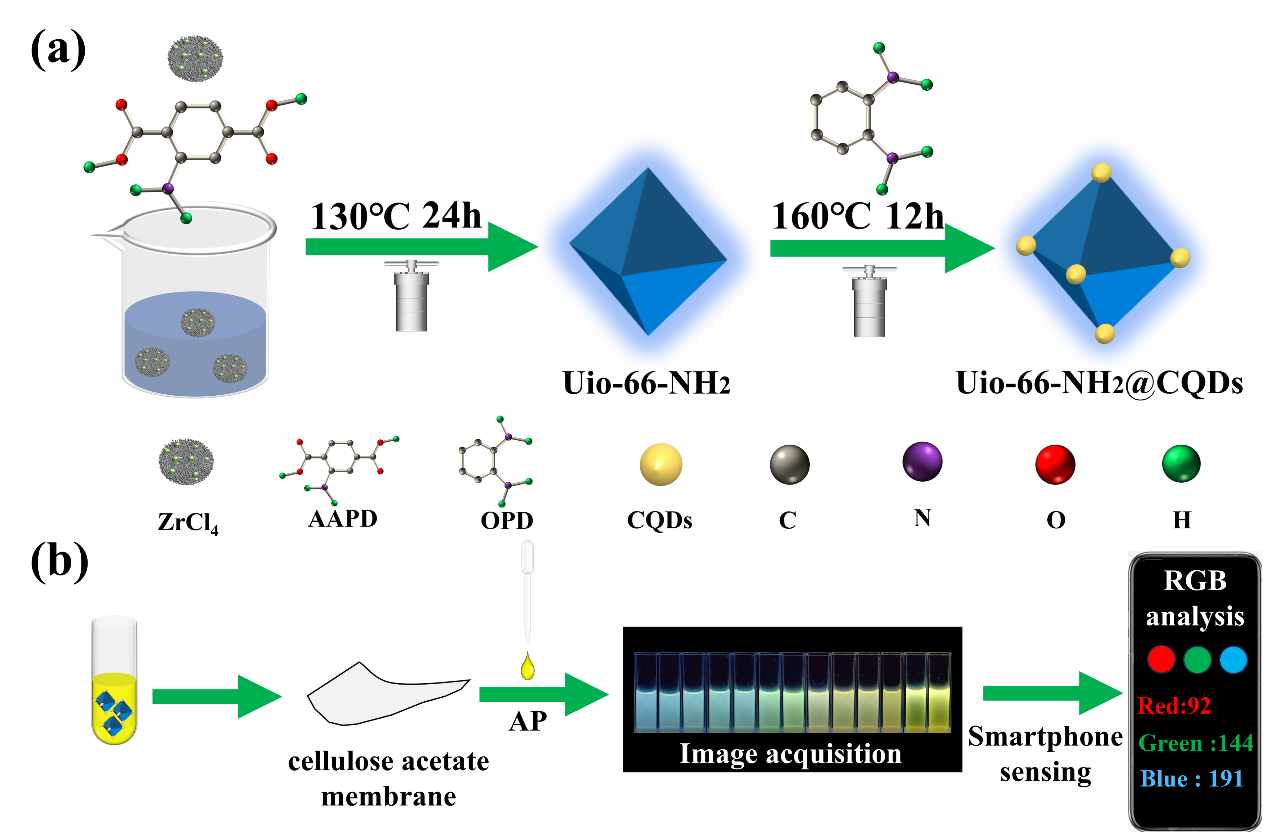

Supplement: Supplementary file 2 [file 3ad665501af018dee12000f5.docx]
